# Supplementary material for: Public Health Risks Associated with Heavy Metal and Microbial Contamination of Drinking Water in Australia
Source: MDPI journal article supplement (doi:10.3390/ijerph16203982), 2019-10-18

## Supplementary material

Figure S1: Examples of plumbing fixtures and fittings

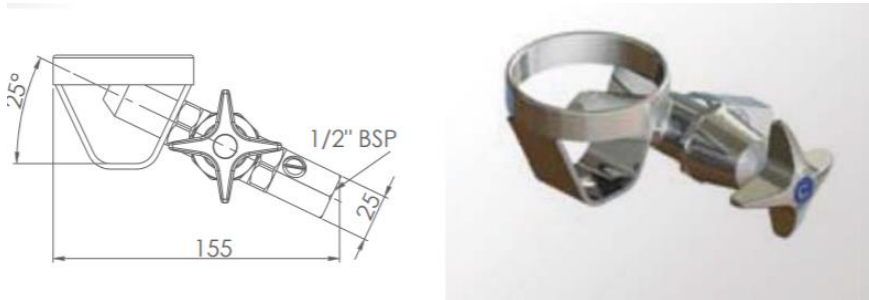

## components

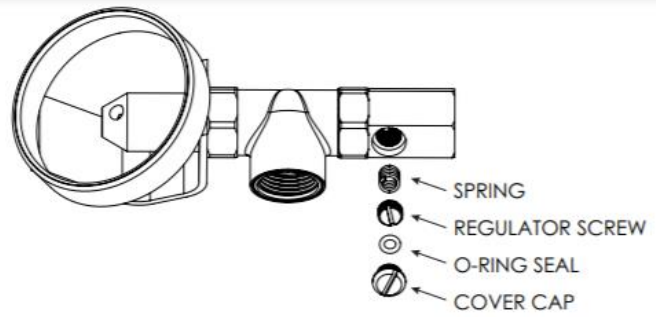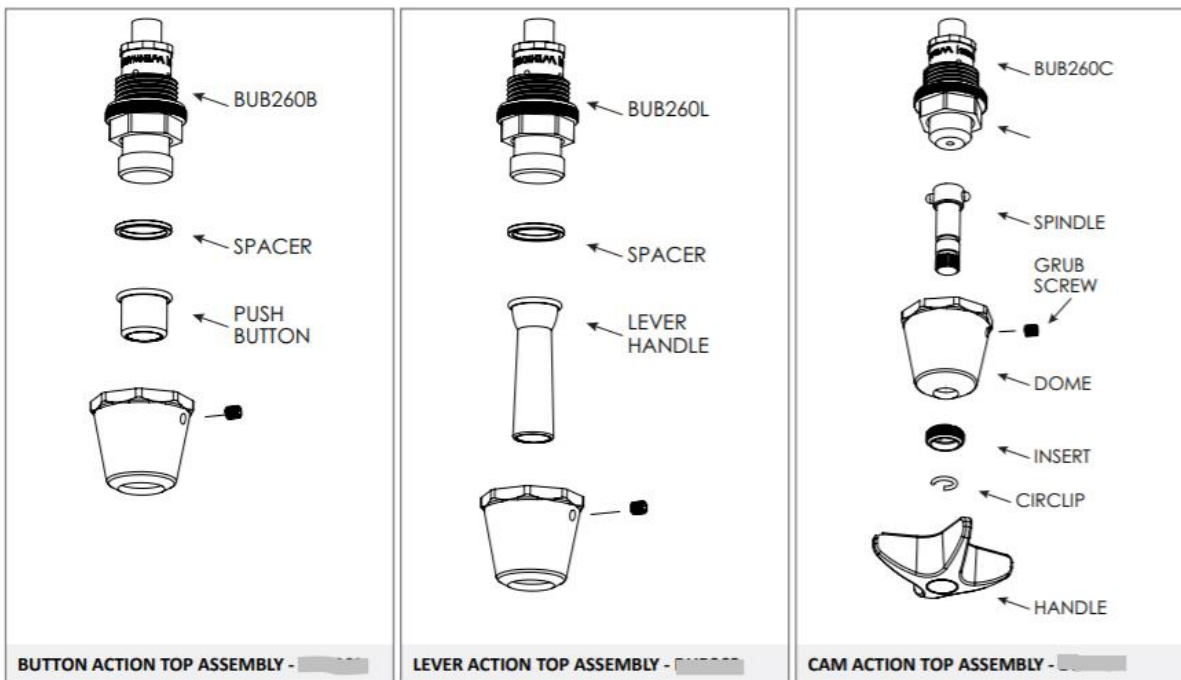

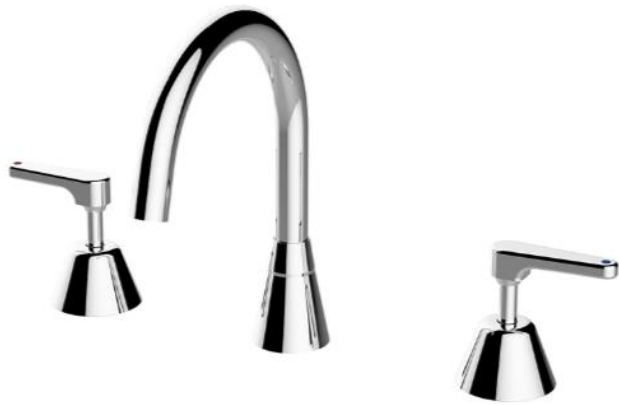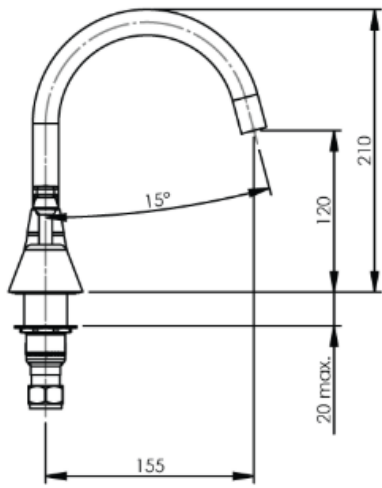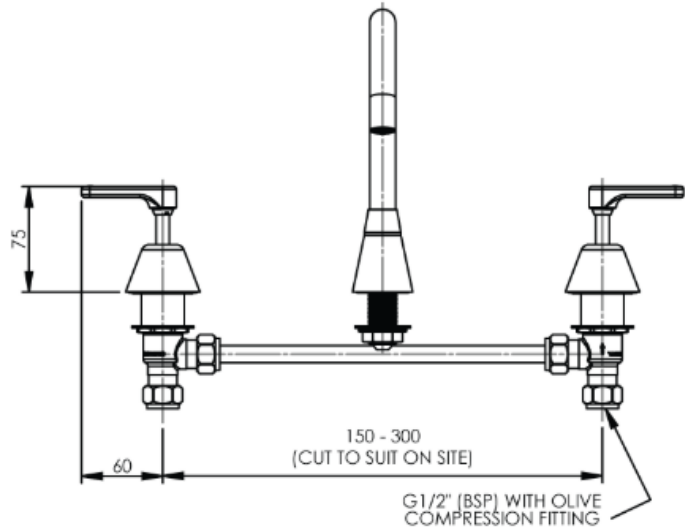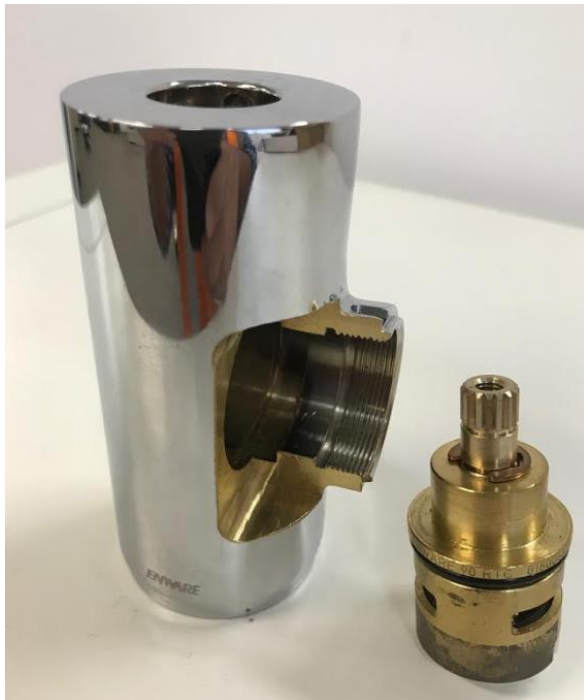

Supplement: s1 [file s1]
